1     **Re-introduction of dengue virus serotype 2 in the State of Rio de Janeiro**  
2                     **after almost a decade of epidemiological silence**

3     Torres María Celeste<sup>1\*</sup>, de Bruycker Nogueira Fernanda<sup>1</sup>, Fernandes Carlos  
4     Augusto<sup>2</sup>, Louzada Silva Meira Guilherme<sup>2</sup>, Ferreira de Aguiar Shirlei<sup>2</sup>, Chieppe  
5                     Alexandre Otavio<sup>3</sup>, Bispo de Filippis Ana María<sup>1</sup>.

6     <sup>1</sup>Laboratório de Flavivírus, Instituto Oswaldo Cruz, Fiocruz, Rio de Janeiro,  
7     Brazil.

8     <sup>2</sup>Laboratório Central Noel Nutels – LACEN, Rio de Janeiro, Brazil

9     <sup>3</sup>Secretaria Estadual de Saúde, Superintendência de Vigilância Sanitária do  
10     Estado do Rio de Janeiro, Brazil

11

12     \*Corresponding author: maria.torres@ioc.fiocruz.br

13

14     Running title: Re-introduction of DENV-2 in Rio de Janeiro

15

16     Competing Financial Interests Statement: The authors declare no competing  
17     financial interests.

18

19     **Abstract**

20     The Asian/American genotype of dengue virus serotype 2 (DENV-2) has been  
21     introduced in Brazil through the state of Rio de Janeiro around 1990, and since  
22     then it has been spreading and evolving, leading to several waves of dengue

23 epidemics that cause a major public health problem. Of particular interest has  
24 been the epidemic of 2008, whose highest impact was evidenced in the state of  
25 Rio de Janeiro, with a higher number of severe cases and mortality rate,  
26 compared to previous outbreaks. Interestingly, no circulation of DENV-2 was  
27 witnessed in this region during the preceding 9-year period. By that time, a new  
28 viral lineage of the Asian/American genotype was identified and pointed as  
29 responsible for the outbreak severity. The same scenario is repeating in 2019 in  
30 this state, however, only a few cases have been detected yet. With the aim to  
31 avoid an outbreak a great magnitude we employed phylogenetic studies  
32 combined with temporal and geographical features to determine the origin of the  
33 current viral strain, analyzing a region of 1626 nucleotides entailing the  
34 Envelope/NS1 viral genes. Our study reveals that the current strain belongs to  
35 the same lineage that caused the 2008 outbreak, however, it is phylogenetically  
36 distant from any Brazilian strain identified so far. Indeed, it seemed to be  
37 originated in Puerto Rico around 2002 and has been introduced into the state in  
38 late 2018. Taking into account that no DENV-2 case was reported over the last  
39 decade in the state, which represents a whole susceptible children generation,  
40 and the fact that a new viral strain may be causing current dengue infections,  
41 these results would be essential to strengthen dengue surveillance and disease  
42 control, avoiding the potential epidemiological consequences of virus spread.

43

#### 44 **Author Summary**

45 By the time DENV2 was introduced into Brazil through the state of Rio de Janeiro  
46 in 1990, the first dengue haemorrhagic cases started to evidence as well. Years  
47 of seasonal outbreaks were followed by almost ten years of epidemiological

48 silence in the state. However, in 2007 this serotype was re-introduced into the  
49 state causing one of the worst dengue epidemics ever described in the country.  
50 The same viral genotype was involved, however, a different viral lineage was  
51 detected and pointed as responsible for the outbreak severity. This same  
52 scenario could repeat nowadays in the state of Rio de Janeiro. Since new DENV-  
53 2 cases are being detected in this region, we analyzed the identity and origin of  
54 the viral strain obtained from two infected patients. Phylogeny combined with  
55 temporal and geographical analyses of viral sequences demonstrated that the  
56 strain causing 2019's dengue cases belonged to the same lineage as the one  
57 causing the outbreak in 2008, but to a different subgroup, and might have  
58 originated in Puerto Rico and entered the state in recent times. This results may  
59 help to prevent the recurrence of epidemics of great magnitude and may  
60 represent as well a key starting point to strengthen Brazilian surveillance systems  
61 and disease control.

62

### 63 **Introduction**

64 Arboviral infections have been re-emerging in Brazil over the last decades,  
65 threatening the country and causing a constant burden for public health [1, 2].  
66 Dengue virus (DENV) serotype 2 is one of the four different serotype of DENV,  
67 an arbovirus that belongs to the *Flavivirus* family, and is transmitted to humans  
68 by mosquitoes from genera *Aedes*. Besides Brazil, DENV is widely distributed  
69 across tropical and subtropical areas of the world [3]. Human travelers and  
70 extensive migrations have facilitated the spread of arbovirus potentially  
71 threatening for human health through the globe [4, 5]. As a tourist magnet, the

72 state of Rio de Janeiro, in southeast Brazil, has been facing large arbovirus  
73 epidemics year by year [6].

74 DENV-2 Asian/American genotype has been introduced into Brazil through the  
75 state of Rio de Janeiro around 1990 [7], and brought along the onset of the first  
76 cases of hemorrhagic fever and dengue shock syndrome. In 2008, in Rio de  
77 Janeiro State alone, a DENV-2 outbreak caused more than 235.000 reported  
78 cases, over 13000 hospital admissions and 263 deaths [8], which represented  
79 increased disease severity and a higher rate of mortality, compared to previous  
80 outbreaks [9]. This epidemic caused staggering human and economic costs, with  
81 more than US\$1 billion being spent at the national level on dengue prevention  
82 and control [10]. Drumond et al demonstrated that the virus causing 2008  
83 epidemic belonged indeed, to the same genotype of the virus that was first  
84 introduced around 1990, but to a totally different lineage [11] with genetic  
85 differences potentially associated with a more pathogenic clinical outcome of the  
86 disease [12].

87 After that period, DENV-2 cases diminished gradually in the state, and different  
88 DENV serotypes and arboviruses such as Zika, Chikungunya and Yellow fever  
89 started to alternate its circulation. This serotype remained undetectable in the  
90 state until 2018, when the Information System for Notifiable Diseases (SINAN)  
91 and the Laboratory Sample Management System (GAL) registered 3 different  
92 dengue cases caused by serotype 2 [13].

93 However, even though at a low rate, and below serotypes 1 and 4, DENV-2  
94 maintained a basal and low circulation at national level, mainly in the north and  
95 northeast regions of the country, where less than 2% of the notified dengue cases  
96 belonged to serotype 2. This scenario abided between 2014 and 2016, but in

97 2017, even being the year with the lowest number of registered dengue cases  
98 nationally, the central-west region of the country started to show a growing  
99 predominance of DENV-2 circulation. During 2018, it kept on spreading at a low  
100 rate, obtaining on average, similar figures as the ones from 2017. However,  
101 throughout this current year, DENV-2 cases reached notification rates 282%  
102 superior as the preceding year, and its circulation has been already confirmed  
103 also in the southeast region of the country, including the state of Rio de Janeiro  
104 [14].

105 Considering that a whole new generation is naïve to this serotype infection and  
106 concerned about a potential new outbreak of great magnitude in the state, we  
107 sought to briefly analyze the virus phylogeny and its origin, to study the potential  
108 threats of this strain spread.

109

## 110 **Materials and methods**

### 111 Ethical statement

112 The strains analyzed in this study belong to the collection from the Laboratory of  
113 Flavivirus, IOC/FIOCRUZ, Rio de Janeiro, Brazil, and were obtained from human  
114 serum through the passive surveillance system from an ongoing Project  
115 approved by resolution number CAAE 90249218.6.1001.5248 from the Oswaldo  
116 Cruz Foundation Ethical Committee in Research (CEP 2.998.362), Ministry of  
117 Health-Brazil. Samples were chosen anonymously, based on the laboratorial  
118 results.

119 Sera samples from infected patients from the municipalities of Vassouras and  
120 Volta Redonda were sent to the Central Laboratory of Rio de Janeiro LACEN/RJ

121 for diagnostic confirmation and DENV-2 serotype was detected by RT-PCR under  
122 Lanciotti's protocol [15]. Genotyping was performed by the Regional Reference  
123 Flavivirus Laboratory at Instituto Oswaldo Cruz/FIOCRUZ in Rio de Janeiro.

#### 124 RNA extraction, RT-PCR and sequencing

125 Briefly, viral RNA was extracted from 140 ul of serum samples using the QIAamp  
126 Viral RNA Mini Kit (Qiagen, CA-EUA), followed by a RT-PCR to amplify a small  
127 portion of 1639 nucleotides entailing the Envelope/NS1 region (1467-3106  
128 according to AF489932 reference sequence) of the viral genome. For this  
129 purpose we used the QIAGEN OneStep RT-PCR Kit (Qiagen, CA-EUA)  
130 according to manufacturer's instructions, and primers pair 3A-4B, described  
131 elsewhere [16]. Thermocycling conditions consisted of a single step of 50°C for  
132 30 minutes and 95°C for 15 minutes for reverse transcription, followed by 40  
133 cycles of denaturation at 94°C (30 seconds), annealing at 63°C (60 seconds),  
134 extension at 72°C (2 minutes) and a final extension at 72°C (10 minutes). PCR  
135 products were confirmed by 1.5% agarose gel electrophoresis stained with SYBR  
136 Safe DNA gel stain (Invitrogen) and visualized under blue light. Subsequently,  
137 PCR specific bands were sliced from the gel and purified with the Qiagen Gel  
138 Extraction Kit (Qiagen, CA-EUA), following manufacturer's instructions.  
139 Quantification of cDNA was carried on with Qubit® fluorometer (Life  
140 Technologies) and finally sequenced by Sanger technique at the DNA  
141 sequencing Platform at Fiocruz Institute, Rio de Janeiro.

#### 142 Phylogenetic analyses

143 The obtained sequences (Genbank accession numbers MK972823 and  
144 MK972824) were manually edited and aligned with BioEdit v7.2.5.0 software using

145 different DENV-2 reference sequences available at Genbank. Alignment of the  
146 final 378 sequences is available from the authors upon request. Evolutionary  
147 model was obtained with JModeltest v2.1.10 software [17] (GTR+I+G), chosen  
148 according the Akaike Information Criterion (AIC) and the Maximum Likelihood  
149 value (lnL), and phylogenetic trees were constructed using the Maximum  
150 likelihood method with RAxML v7.0 software. The robustness of the phylogenetic  
151 grouping was evaluated by bootstrap analysis with 1000 replicates. Phylogenetic  
152 tree was finally visualized in Figtree v1.4.3 software (available at  
153 <http://tree.bio.ed.ac.uk/software/figtree/>).

#### 154 Spatiotemporal dispersion analyses

155 Based on phylogenetic results, sequences conforming the cluster of lineage IV of  
156 Asian/American genotype (n=137) with their respective epidemiological data  
157 were subset to carry on further temporal and geographical estimations of the  
158 evolutionary process. The time scale of the evolutionary process was assessed  
159 employing the sequences collection dates obtained from the Genbank  
160 annotations, and a GTR+I+G4 nucleotide substitution model, a relaxed  
161 uncorrelated lognormal molecular clock model, and a Bayesian Skyline  
162 coalescent tree prior. Migration events and their most reliable migration pathways  
163 were estimated using a non-reversible discrete phylogeography model with the  
164 Bayesian stochastic search variable selection approach, and a continuous-time  
165 Markov chain (CTMC) migration rate reference prior. The analysis was  
166 implemented in BEAST v1.8.1 software package [18]. The Markov Chain Monte  
167 Carlo analysis was run for 100 million generations and convergence was  
168 assessed in Tracer v1.7 (<http://tree.bio.ed.ac.uk/software/tracer/>): 10% of the  
169 sampling trees were discarded as burn-in and accepted effective sample sizes

170 (ESS) values should be higher than 200. The 95% highest posterior density  
171 (HPD95%) interval was considered to estimate uncertainty for each estimated  
172 parameter. A maximum clade credibility tree (MCCT) was constructed with the  
173 TreeAnnotator v1.8.1 software (part of the BEAST package) after discarding 10%  
174 of the sampling, and visualized with the FigTree v1.4.3 program (available at  
175 <http://tree.bio.ed.ac.uk/software/figtree/>).

176

## 177 **Results and discussion**

178

179 Phylogenetic analysis showed that DENV-2 strains detected in patient sera from  
180 both municipalities belong to the same lineage of Asian/American genotype that  
181 caused the outbreak in 2008. However, it grouped in a totally separated cluster  
182 from sequences previously obtained from different locations of Brazil (Figure 1).  
183 The current lineage has been previously described by Mir et al. as lineage IV,  
184 which dominated the epidemics in South and Central America during the 2000s  
185 [19].

186

187 Figure 1 - Maximum likelihood phylogenetic tree of DENV-2 partial envelope and  
188 NS1 coding sequences. DENV-2 dataset includes sequences principally from the  
189 Asian/American (n=361), American (n=5), Asian I (n=5), Asian II (n=5) and  
190 Cosmopolitan (n=2) genotypes. Asian/American genotype includes sequences  
191 from the United States of America [USA] (n=19), Mexico (n=5), Nicaragua (n=13),  
192 Guatemala (n=1), Belize (n=1), Guyana (n=1), Suriname (n=11), Ecuador (n=2),  
193 Venezuela (n=35), Colombia (n=15), Peru (n=48), Bolivia (n=12), Paraguay



194 (n=5), Brazil [BR] (n=137, which includes 77 from the southeast region and 32  
195 from the northeast) and from the Caribbean Islands which includes Jamaica  
196 (n=1), Puerto Rico (n=13), Cuba (n=2), Dominican Republic (n=4) and the Lesser  
197 Antilles islands (n=36) conformed by Trinidad and Tobago, the Virgin Islands,  
198 Aruba, Dominica, Barbados, Grenada, Martinique, among others. Taxa are  
199 represented with circles and colored according to the geographic origin of each  
200 sequence as indicated at the legend (up left). The small cluster containing  
201 isolates from the State of Rio de Janeiro in 2019 is zoomed-in. The asterisk in  
202 the nodes corresponds to bootstrap values higher than 70, obtained with 1000  
203 replicates. The scale bar indicates the genetic distances. The branch lengths are  
204 drawn to scale with the bar at the bottom indicating nucleotide substitutions per  
205 site.

**Local**

- Belize
- Bolivia
- Brazil
- Cambodia
- Caribbean Islands
- Colombia
- Cuba
- Ecuador
- El Salvador
- Guatemala
- Guyana
- India
- Mexico
- Nicaragua
- Northeast BR
- PapuaNewGuinea
- Paraguay
- Peru
- Singapore
- SouthBR
- SoutheastBR
- Suriname
- Thailand
- USA
- Venezuela

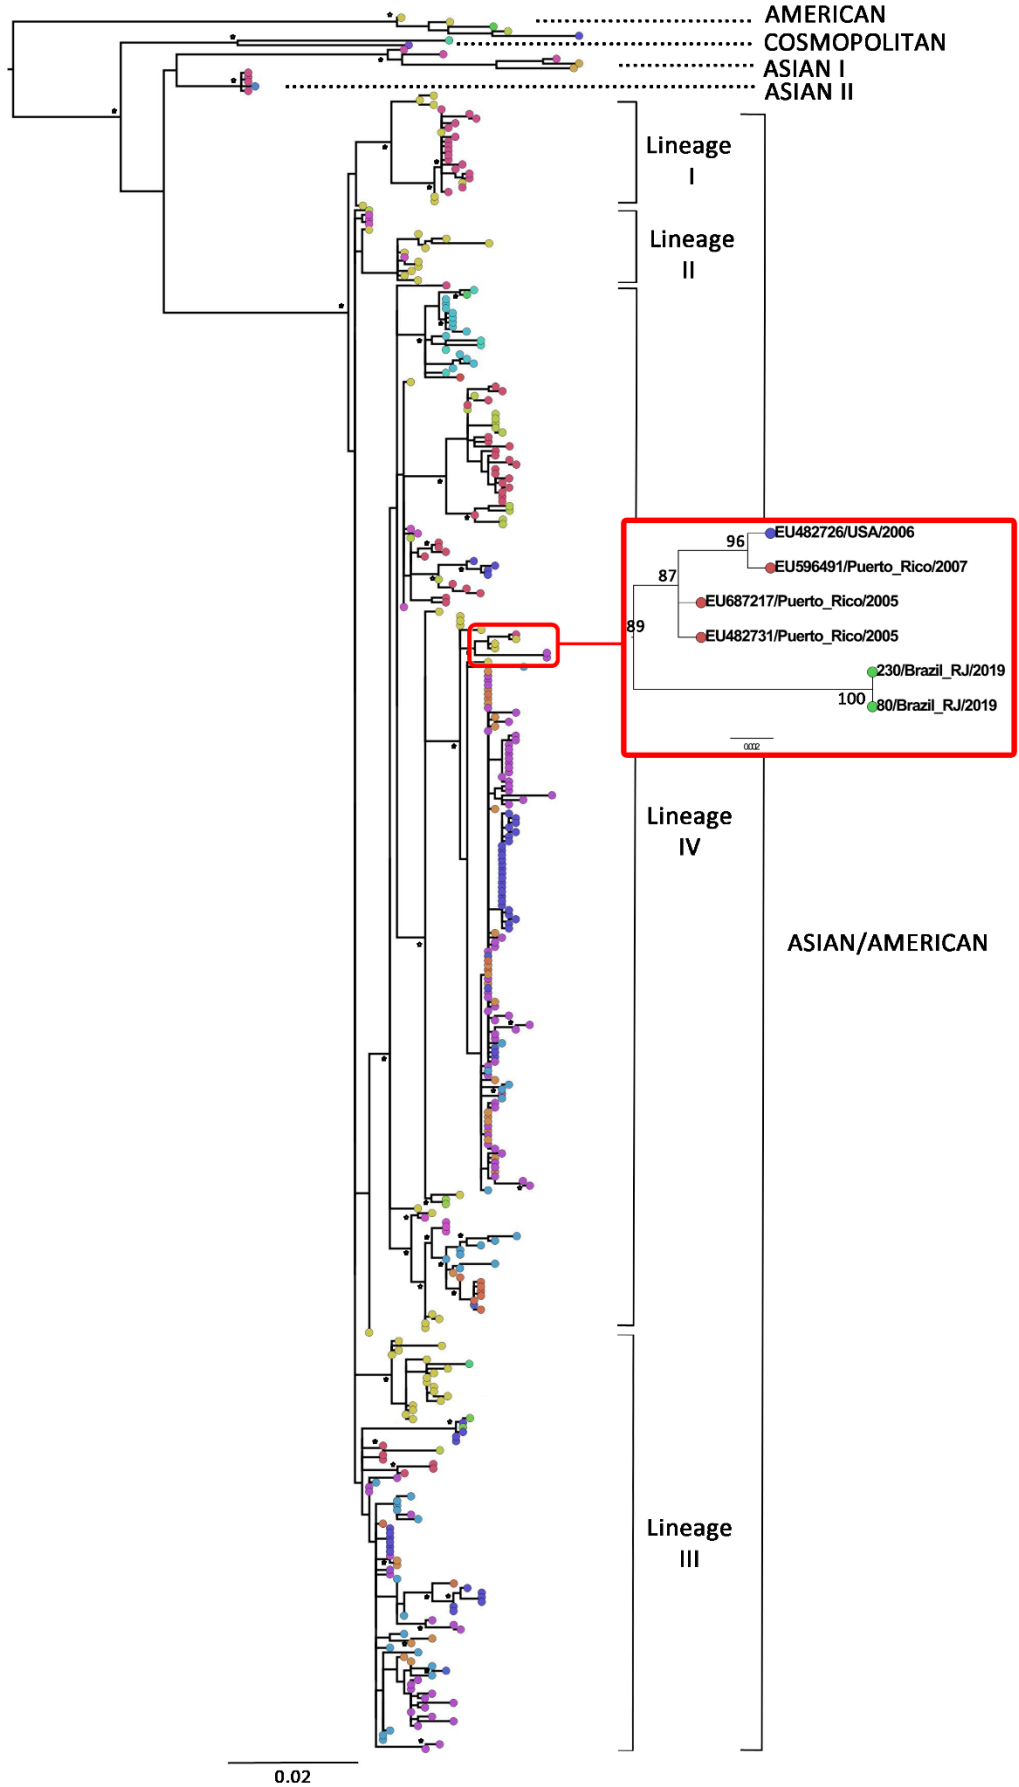

207 Surprisingly, this year' sequences grouped together with sequences from Puerto  
208 Rico and the United States of 2005-2007, in a highly supported cluster (Figure  
209 1). These findings suggest that a new viral strain may have been introduced into  
210 the state of Rio de Janeiro, which in effect, is genetically different from viral strains  
211 that kept on circulating basally in other regions of the country, at least in the viral  
212 covered region under study.

213 To have a more detailed picture of where this strain comes from, we conducted  
214 temporal and geographical analysis with a reduced dataset of 138 sequences  
215 conforming lineage IV group. These results suggest that the viral strain detected  
216 in our study originated in Puerto Rico (Posterior state probability [PSP]=0,81) in  
217 2002 (95% HPD: 2000–2004) (Figure 2), and was then introduced in our state,  
218 where it started to spread in late 2018 (95% HPD: 2018–2019). To notice, no  
219 DENV-2 case has been diagnosed during the course of 2019 in the Caribbean  
220 countries [20], which clearly suggests that Rio de Janeiro's 2019 strain could  
221 have been circulating elsewhere, up to its arrival into the state, or could have  
222 been replicating silently for some time up to rise to a detectable level. It would be  
223 likely that actually, the viral strain that entered into the state of Rio de Janeiro  
224 might well be introduced first into a different Brazilian state and spread then to  
225 Rio de Janeiro, based on the increasing DENV-2 reported cases of other states.  
226 As previously mentioned, since 2017, DENV-2 cases have been increasing and  
227 spreading through the central-west region, reaching the southeast region in 2018  
228 and early 2019. The latter was responsible for 65.7% of the cases reported until  
229 March 2019 and is witnessing local epidemics in several municipalities of three  
230 of the four states that integrate it: Sao Paulo, Minas Gerais, and Espirito Santo;  
231 coincidentally, the three states that surround geographically the fourth integrant

232 of the group, the state of Rio de Janeiro [14]. Nevertheless, no molecular  
233 epidemiology analyses have been carried on to study genetic viral characteristics  
234 on those cases, and to confirm this statement we will need further sequencing  
235 yet unavailable. In fact, important caveats should be taken into account for the  
236 posed hypothesis: the limited number of available sequences of Latin America  
237 covering the region under study, and the lack of Brazilian sequences from this  
238 last 5 years period. These two aspects, if different, could be responsible for  
239 dissimilar estimations. The lack of DENV-2 Brazilian sequences over recent times  
240 goes hand-in-hand with the low circulation of this serotype across the country.  
241 Nevertheless, filling this information gap would be determinant to define when  
242 this new strain has actually entered into our territory.

243

244 Figure 2 - Time-scaled Bayesian Maximum Clade Credibility tree corresponding  
245 to the lineage IV of Asian/American genotype. Two major highly supported  
246 subclades are identified: southeast and southwest. Brazilian sequences are all  
247 included in the southeast subclade, and isolates under study are highlighted with  
248 an asterisk (\*). Branches are colored according to the most probable location  
249 (legend shown on the left side) of their parental node inferred by discrete  
250 phylogeographical analysis. Location at key nodes involved in the introduction of  
251 subclade southeast into Brazil are highlighted. Posterior state probability values  
252 higher than 0,7 at key nodes are represented by a dot. All horizontal branch  
253 lengths are drawn to a scale of years. Time scale can be observed in the x-axis.  
254 The tree is automatically rooted under the assumption of a relaxed molecular  
255 clock.

256

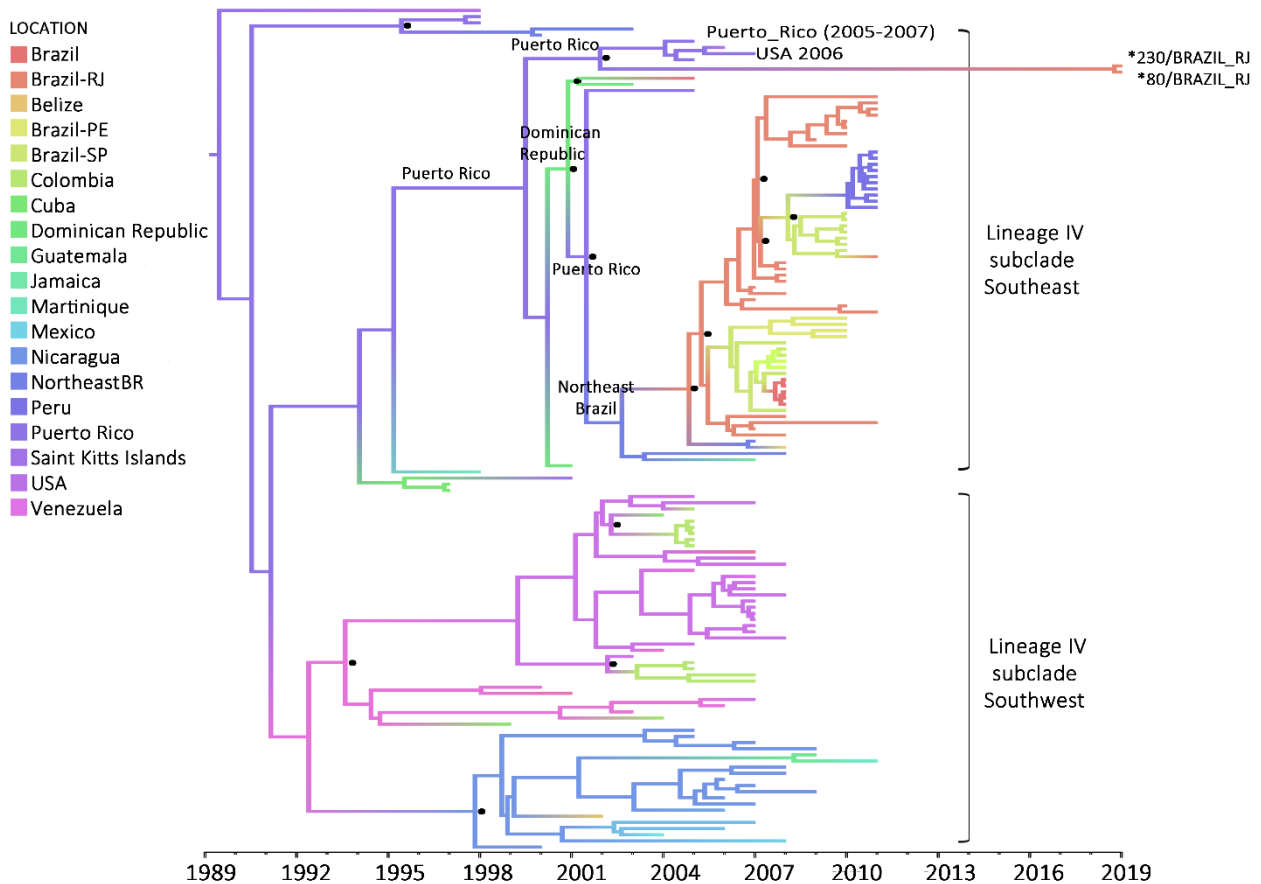

257

258 Even though it is not the main focus of this note, the spatial and temporal origin  
 259 of lineage IV estimated in our analysis is consistent with previous results [11, 19].  
 260 This lineage probably arose in Puerto Rico in middle 1989 (95% HPD=1985–  
 261 1993) and became the dominant lineage in South and Central America from the  
 262 early/middle 2000s onwards. However, little differences were detected for the  
 263 subclade that spread through the southeast pathway. This subclade probably  
 264 arose with the introduction of a virus from Puerto Rico (PSP=0,67) into the  
 265 northeast region of Brazil around 2003 (95% HPD=2001-2004), moving then to  
 266 the state of Rio de Janeiro (PSP=0,65) in 2005 (95% HPD=2004-2006), and  
 267 spreading thereafter through the southeast region. This northeast passage  
 268 however presented a low probability (PSP=0,3). Drummond and collaborators

269 discussed in their work, a possible migration pathway through the north of the  
270 country before the arrival of this lineage into the southeast region. Thus, this  
271 observation was statistically unsupported [11]. For Mir and collaborators  
272 however, the circulation of this Southeast subclade, named in their work IV-SA4,  
273 started after the introduction of the virus from the Great Antilles directly into the  
274 southeast Brazilian region in 2004, moving then to the northeastern region, as  
275 well as to other countries in South America [19]. All the consistencies detected  
276 between our work and those already mentioned, represent little hallmarks that  
277 contribute credibility to the estimates made about this potential new viral strain  
278 detected in the State of Rio de Janeiro.

279 According to our estimations, the evolutionary rate of lineage IV was  $9,5 \times 10^{-4}$   
280 substitutions/site/year (95% HPD= $7,7 \times 10^{-4}$ – $1,2 \times 10^{-3}$  substitutions/site/year),  
281 exactly the same reported by Mir et al [19]. To notice, the strain giving rise to the  
282 virus isolates detected this year in the State of Rio de Janeiro, presented a  
283 nucleotide substitution rate at the lower limit of the 95%HPD interval, which would  
284 be consistent with slower evolution dynamics and a delayed detection.

285 On the other hand, our results regarding DENV-2 population dynamic of lineage  
286 IV showed a clear drop in population size between 2005 and 2010, and remained  
287 steady until this year (Figure 3). This observation could be consistent with the fact  
288 that other arboviruses different than DENV have been the responsible for the  
289 main epidemics of these last years in the American continent [21].

290

291 Figure 3 - Demographic reconstruction of lineage IV of Asian/American genotype.

292 Changes in effective population size since the time of the most recent common

293 ancestor were estimated using the uncorrelated lognormal relaxed molecular  
294 clock and the Bayesian Skyline coalescent model. Middle blue line represented  
295 the mean value for the effective sample size, while grey areas the 95%  
296 confidence interval.

297

298

299

300

301

302

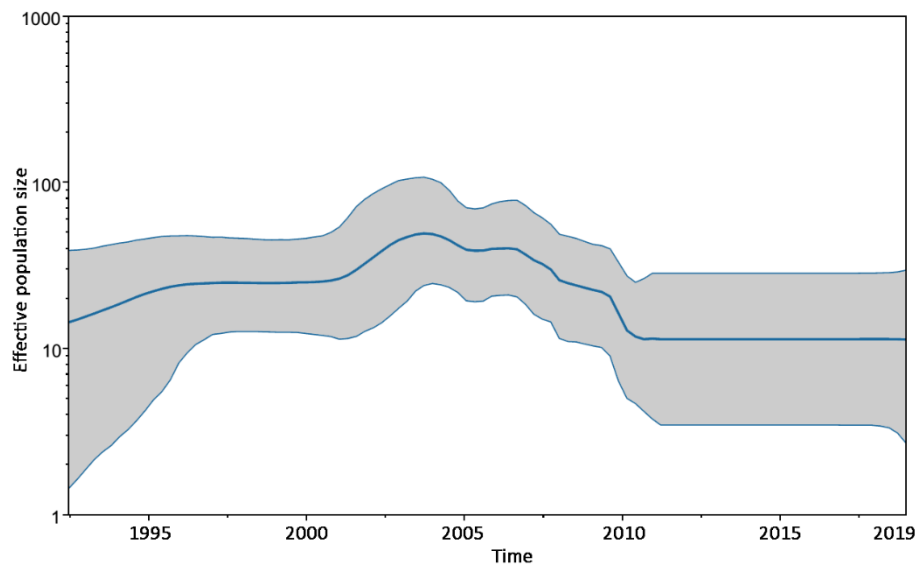

303

304

305 The phenomenon of DENV-2 lineage replacement across successive epidemic  
306 outbreaks has been well demonstrated by Mir and collaborators [19]. It should  
307 be considered that the circulation of lineage III (that dominated the Caribbean  
308 and South America in the 1990s) and IV in the State of Rio de Janeiro, was  
309 separated by an 8-year period. This might mean that, aside from the potential  
310 viral differences between both lineages itself [12], a generation of children born  
311 during this inter-lineage silent period had never be exposed to this serotype, by  
312 the time lineage IV entered the state. This fact could be somehow involved in the  
313 changes observed in 2007-2008 outbreak regarding the age-group affected.  
314 Thus, considering these evidences, strong surveillance and further analysis  
315 would be suggested as close future strategies for DENV-2 infection control and

316 prevention, to prevent a potential new epidemic that could be of great magnitude  
317 like the one the state of Rio has already experienced a decade ago.

318

### 319 **Funding**

320 The authors want to thank FIOCRUZ and CAPES for the financial support. The  
321 funders had no role in study design, data collection and analysis, decision to  
322 publish, or preparation of the manuscript.

323

### 324 **Author Contributions**

325 Conceived and designed the experiments: FdBN MCT AMBdF. Performed the  
326 experiments: MCT. Analyzed the data: MCT FdBN. Contributed  
327 reagents/materials/analysis tools: CAF SFdA AOC AMBdF. Wrote the paper:  
328 MCT FdBN AMBdF.

329

### 330 **References**

331

- 332 1. Lima-Camara TN. Emerging arboviruses and public health challenges in  
333 Brazil. Rev Saude Publica. 2016, 50:36. doi: 10.1590/S1518-  
334 8787.2016050006791.
- 335 2. Donalisio MR, Freitas ARR, Zuben APBV. Arboviruses emerging in Brazil:  
336 challenges for clinic and implications for public health. Rev Saude Publica.  
337 2017; Mar 29;51:30. doi: 10.1590/S1518-8787.2017051006889.



- 338 3. Guzman MG & Harris E. Dengue. Lancet. 2015 Jan 31;385(9966):453-65.  
339 doi: 10.1016/S0140-6736(14)60572-9. Epub 2014 Sep 14.
- 340 4. Aagaard-Hansen J, Nombela N, Alvar J. Population movement: a key  
341 factor in the epidemiology of neglected tropical diseases. Trop Med Int  
342 Health. 2010;15(11):1281-8. Doi:10.1111/j.1365-3156.2010.02629.x
- 343 5. Nunes MR, Palacios G, Faria NR, Sousa EC Jr, Pantoja JA, Rodrigues  
344 SG, et al. Air travel is associated with intracontinental spread of dengue  
345 virus serotypes 1-3 in Brazil. PLoS Negl Trop Dis. 2014 Apr 17;8(4):e2769.  
346 doi: 10.1371/journal.pntd.0002769.
- 347 6. SMS-RJ. Secretaria municipal de Saúde, Rio de Janeiro. Epidemiological  
348 bulletins 2014-2019. Available in:  
349 <http://www.riocomsaude.rj.gov.br/site/Conteudo/Dados.aspx>
- 350 7. Nogueira R, Miagostovich M, Lampe E, Schatzmayr H. Isolation of dengue  
351 virus type 2 in Rio de Janeiro. Mem Inst Oswaldo Cruz. 1990, 85: 253.
- 352 8. SVS, MS. Secretaria de Vigilância em Saúde, Ministério da Saúde.  
353 Epidemiological situation. Available in:  
354 [http://portalms.saude.gov.br/saude-de-a-z/dengue/situacao-  
355 epidemiologica-dados](http://portalms.saude.gov.br/saude-de-a-z/dengue/situacao-epidemiologica-dados)
- 356 9. Siqueira JB Jr, Vinhal LC, Said RFC, Hoffmann JL, Martins J, Barbiratto  
357 SB, et al. Dengue no Brasil: tendências e mudanças na epidemiologia,  
358 com ênfase nas epidemias de 2008 e 2010. In: Saúde Brasil 2010: uma  
359 análise da situação de saúde e de evidências selecionadas de impacto de  
360 ações de vigilância em saúde/Ministério da Saúde, Secretaria de  
361 Vigilância em Saúde, Departamento de Análise de Situação em Saúde. –  
362 Brasília: Ministério da Saúde;2011. p. 157-72.

- 363 10. CONASS. 2011. Dengue situação atual, desafios e estratégias para  
364 enfrentamento [Dengue: presente situation, challenges and strategies for  
365 confronting it]. Brazil Conselho Nacional de Secretários de Saúde (also  
366 available at: <http://www.conass.org.br/>)
- 367 11. Drumond BP, Mondini A, Schmidt DJ, de Moraes Bronzoni RV, Bosch I,  
368 Nogueira ML. Circulation of different lineages of Dengue virus 2, genotype  
369 American/Asian in Brazil: dynamics and molecular and phylogenetic  
370 characterization. PLoS One. 2013; 8(3):e59422. doi:  
371 10.1371/journal.pone.0059422.
- 372 12. Nunes PC, Sampaio SA, da Costa NR, de Mendonça MC, Lima Mda R,  
373 Araujo SE, et al. Dengue severity associated with age and a new lineage  
374 of dengue virus-type 2 during an outbreak in Rio De Janeiro, Brazil. J Med  
375 Virol. 2016;88(7):1130-6.
- 376 13. SVG-RJ. Secretaria de Estado de Saúde do Rio de Janeiro, Gerência de  
377 doenças transmitidas por vetores e zoonoses. Boletim epidemiológico  
378 arboviroses Nº 001/2019. Available in:  
379 [http://www.riocomsaude.rj.gov.br/Publico/MostrarArquivo.aspx?C=NLiRC](http://www.riocomsaude.rj.gov.br/Publico/MostrarArquivo.aspx?C=NLiRC75f1TU%3d)  
380 [75f1TU%3d](http://www.riocomsaude.rj.gov.br/Publico/MostrarArquivo.aspx?C=NLiRC75f1TU%3d)
- 381 14. SVS, MS. Secretaria de Vigilância em Saúde, Ministério da Saúde.  
382 Epidemiological bulletins 2014 -2019. Available in:  
383 <http://portalms.saude.gov.br/boletins-epidemiologicos>
- 384 15. Lanciotti RS, Calisher CH, Gubler DJ, Chang GJ, Vorndam AV. Rapid  
385 detection and typing of dengue viruses from clinical samples by using  
386 reverse transcriptase-polymerase chain reaction. J Clin Microbiol. 1992;  
387 30: 545–551.

- 388 16. Faria NR, Nogueira RM, de Filippis AM, Simões JB, Nogueira FdeB, da  
389 Rocha Queiroz Lima M, et al. Twenty years of DENV-2 activity in Brazil:  
390 molecular characterization and phylogeny of strains isolated from 1990 to  
391 2010. *PLoS Negl Trop Dis.* 2013; 7(3):e2095. doi:  
392 10.1371/journal.pntd.0002095.
- 393 17. Posada D. jModelTest: phylogenetic model averaging. *Mol Biol Evol.*  
394 2008, 25:1253–1256.
- 395 18. Drummond AJ, Rambaut A. BEAST: Bayesian evolutionary analysis by  
396 sampling trees. *BMC Evol Biol.* 2007, 7: 214.
- 397 19. Mir D, Romero H, Fagundes de Carvalho LM, Bello G. Spatiotemporal  
398 dynamics of DENV-2 Asian-American genotype lineages in the Americas.  
399 *PLoS One.* 2014 Jun 4;9(6):e98519. doi: 10.1371/journal.pone.0098519.
- 400 20. PAHO, Panamerican Health Organization. Actualización Epidemiológica  
401 Dengue 2019. Available in:  
402 [https://www.paho.org/hq/index.php?option=com\\_docman&view=download&category\\_slug=2019-3&alias=47784-22-de-febrero-de-2019-dengue-](https://www.paho.org/hq/index.php?option=com_docman&view=download&category_slug=2019-3&alias=47784-22-de-febrero-de-2019-dengue-actualizacion-epidemiologica&Itemid=270&lang=en)  
403 [actualizacion-epidemiologica&Itemid=270&lang=en](https://www.paho.org/hq/index.php?option=com_docman&view=download&category_slug=2019-3&alias=47784-22-de-febrero-de-2019-dengue-actualizacion-epidemiologica&Itemid=270&lang=en)
- 404
- 405 21. Espinal MA, Andrus JK, Jauregui B, Waterman SH, Morens DM, Santos  
406 JI, et al. Emerging and Reemerging Aedes-Transmitted Arbovirus  
407 Infections in the Region of the Americas: Implications for Health Policy.  
408 *Am J Public Health.* 2019 Mar;109(3):387-392. doi:  
409 10.2105/AJPH.2018.304849.
- 410
- 411
- 412
